# Supplementary material
Source: publisher figshare collection journal article supplement (https://acs.figshare.com/ndownloader/files/4297990)
Supplement: Supplementary file 1 [file 4297990]

# **New Semiconducting Coordination Polymers from Zinc Sulfide Clusters and Chains**

Ziyi Chen,<sup>†</sup> Daibing Luo,<sup>‡</sup> Maoping Kang<sup>†</sup> and Zhien Lin<sup>†,\*</sup>

<sup>†</sup> *College of Chemistry, Sichuan University, Chengdu 610064, P. R. China.*

<sup>‡</sup> *Analytical & Testing Center, Sichuan University, Chengdu 610064, P. R. China*

\* To whom correspondence should be addressed. Fax: +86-28-85418451. E-mail:

zhienlin@scu.edu.cn

**Figure captions:**

**Figure S1.** IR spectrum of **1**.

**Figure S2.** IR spectrum of **2**.

**Figure S3.** TGA curve of **1** in N<sub>2</sub> with a heating rate of 10 °C.

**Figure S4.** TGA curve of **2** in N<sub>2</sub> with a heating rate of 10 °C.

**Figure S5.** Experimental and simulated XRD patterns of **1**.

**Figure S6.** Experimental and simulated XRD patterns of **2**.

**Figure S7.** (a) A view of the left-handed helical chain in crystal **1b**. In comparison, crystal **1a** with opposite handedness possesses right-handed helical chain (b). Phenyl groups are omitted for clarity. Color code: Zn, green; S, yellow; N, blue; C, gray.

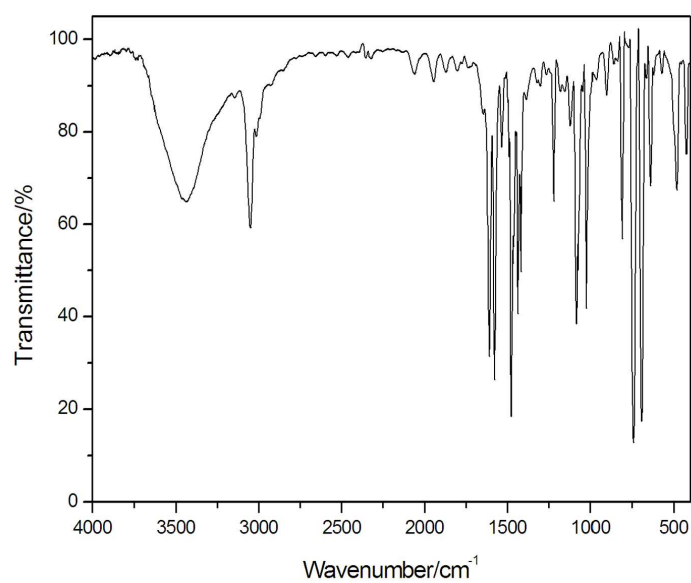

**Figure S1**

FTIR data (cm<sup>-1</sup>): 3051 (m,  $\nu$ (=CH)), 1610 (s,  $\delta$ (C=C)), 1577 (s,  $\delta$ (C=C)), 1477 (vs,  $\delta$ (C=C)), 1436 (s,  $\delta$ (C=C)), 1219 (m,  $\nu$ (C-C)), 1084 (s,  $\nu$ (C-S)), 1024 (s,  $\nu$ (C-S)), 810 (m,  $\delta$ (=CH)), 742 (vs,  $\delta$ (=CH)), 692 (vs  $\delta$ (=CH))

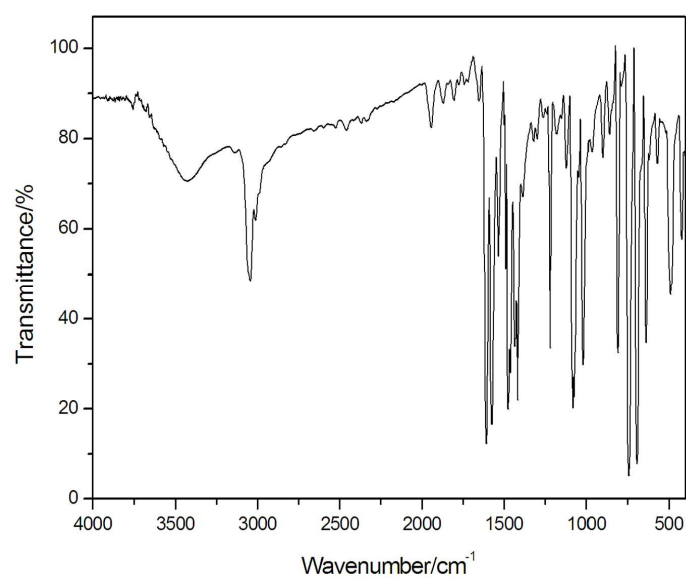

**Figure S2**

FTIR data ( $\text{cm}^{-1}$ ): 3049 (m,  $\nu(\text{=CH})$ ), 1608 (s,  $\delta(\text{C=C})$ ), 1576 (s,  $\delta(\text{C=C})$ ), 1475 (vs,  $\delta(\text{C=C})$ ), 1417 (s,  $\delta(\text{C=C})$ ), 1219 (m,  $\nu(\text{C-C})$ ), 1080 (s,  $\nu(\text{C-S})$ ), 1018 (s,  $\nu(\text{C-S})$ ), 810 (m,  $\delta(\text{=CH})$ ), 744 (vs,  $\delta(\text{=CH})$ ), 694 (vs,  $\delta(\text{=CH})$ ).

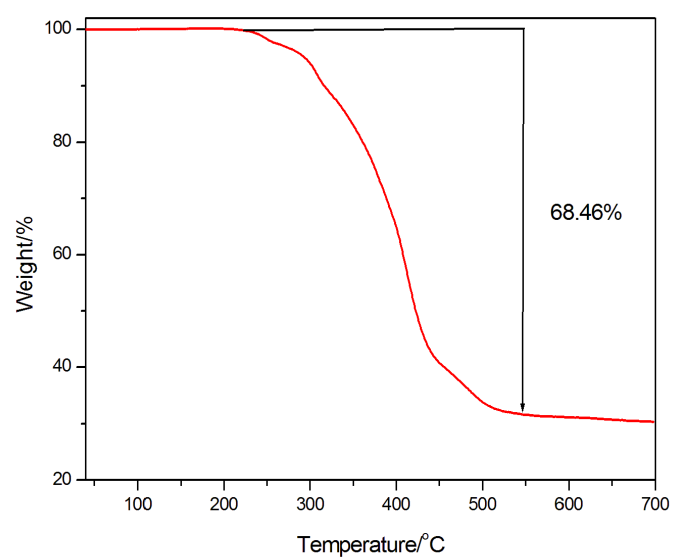

**Figure S3**

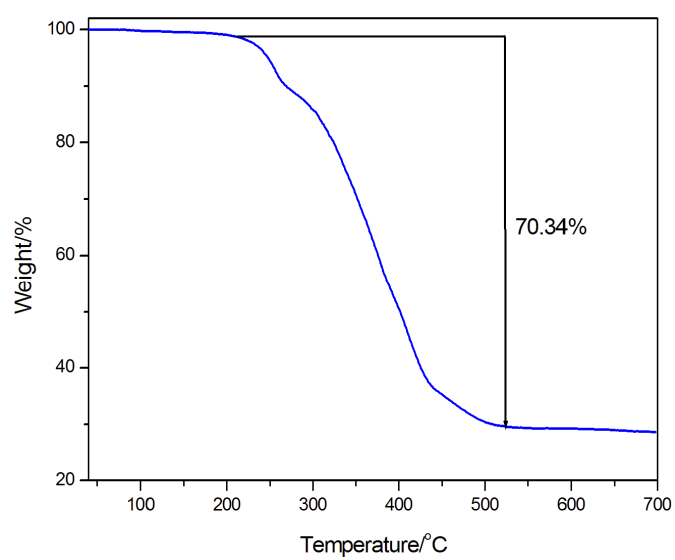

**Figure S4**

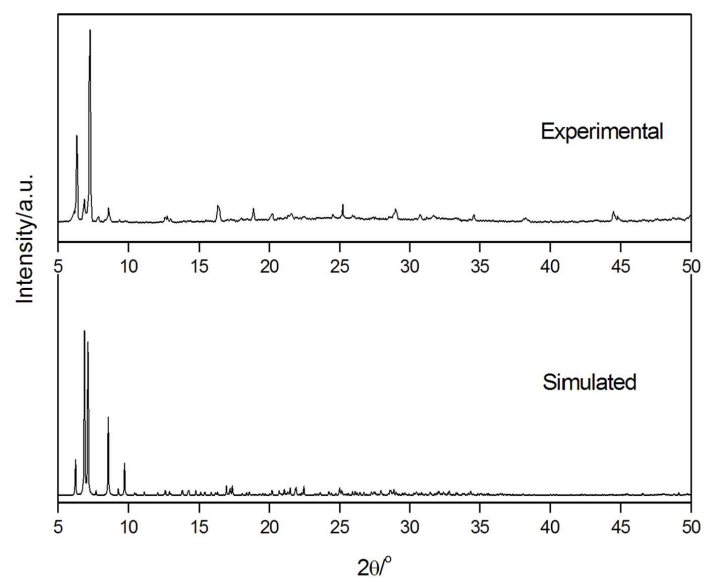

**Figure S5**

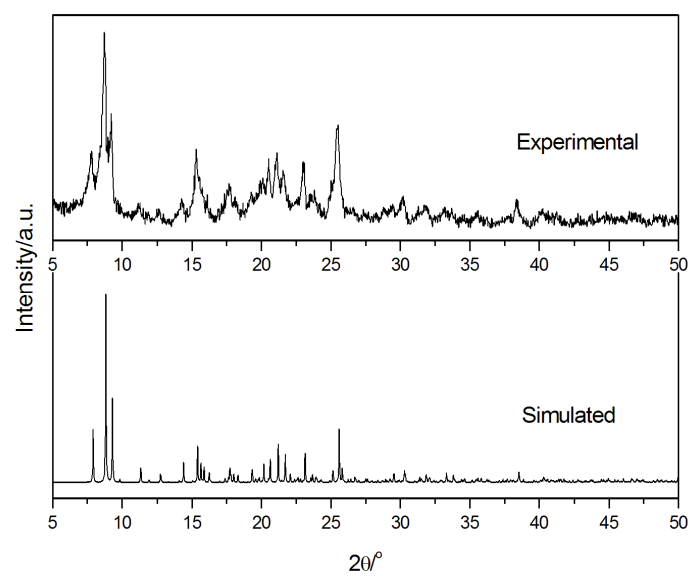

**Figure S6**



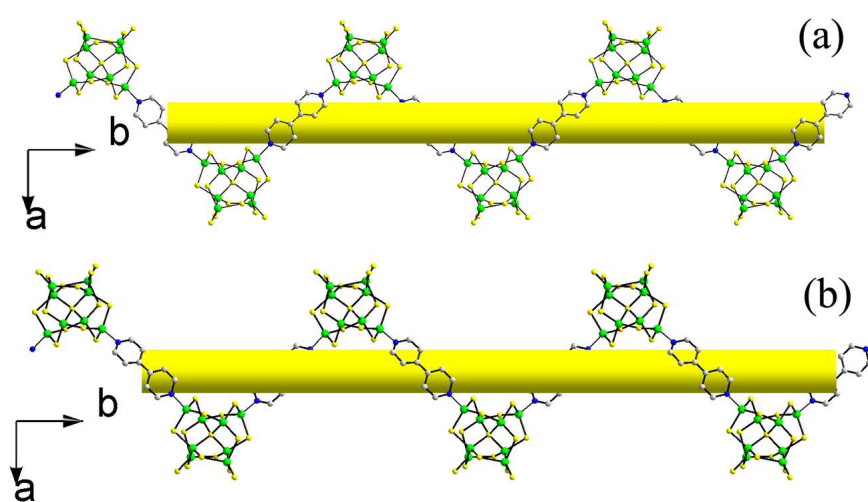

**Figure S7**
